# Supplementary material for: Temperature dependence of hydrogen diffusion in reservoir rocks: implications for hydrogen geologic storage
Source: Royal Society of Chemistry journal article supplement (doi:10.1039/d4ya00233d), 2024-01-01
Supplement: d4ya00233d1.pdf [file d4ya00233d1.pdf]

## Supplying Information

### *Dilution Effect On Concentration Measurements*

Figure S1 illustrates the effect of sampling-induced dilution on experimental diffusion measurements. The estimated impact of dilution ranges from 0.2 to 3.7% standard deviation in  $C/C_0$  values over the considered diffusion timescale (up to 100 minutes). Therefore, the established experimental procedure, with a sampling rate of 0.2 mL/minute, has a negligible impact on the accuracy of diffusion coefficient measurements.

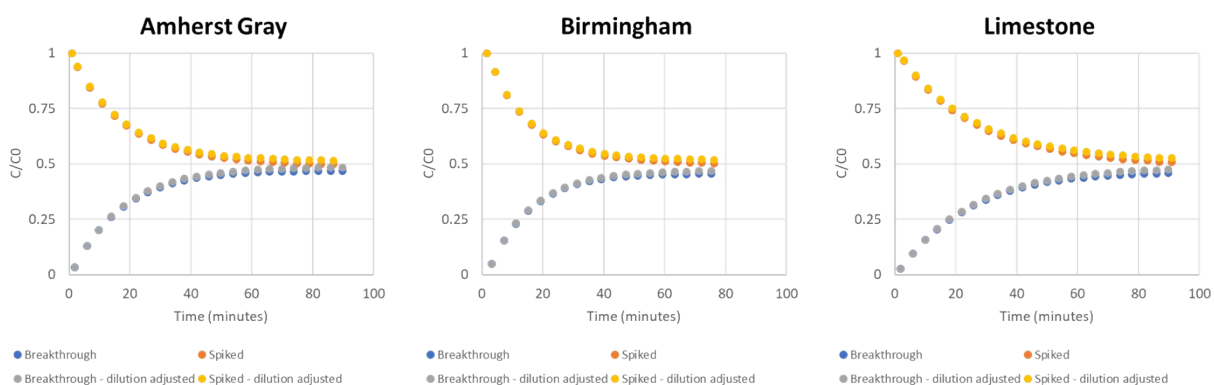

**Figure S1:** Ambient temperature breakthrough showing the impact of dilution over the < 100-minute diffusion experiment.

### *Diffusion in a Two-Bulb Cell*

The general equation for advection-diffusion is <sup>73</sup>

$$\frac{\partial c}{\partial t} = \nabla \cdot (D\nabla c) - \nabla \cdot (vc) + R \quad (S1)$$

where  $c$  is the concentration,  $t$  is the elapsed time for transport,  $D$  is diffusion coefficient,  $v$  is the velocity field and  $R$  is the source or sink term of  $H_2$  molecules.

In the system of interest, constant-pressure flow mode is achieved and thereby pure diffusion is established. Then Eq. (S1) reduces to

$$\frac{\partial c}{\partial t} = \nabla \cdot (D\nabla c) \quad (S2)$$

A solution of the concentration within the connecting tube is a function of position and time. With the assumption of a quasi-steady state and linear concentration profile within the tube, Fick's first law <sup>74</sup> can be applied to predict concentration changes as a function of time for either bulb:

$$V_2 \frac{\partial c_2}{\partial t} = -DA(c_2 - c_1)/L, \quad (S3)$$

where  $V_2$  is the volume of the breakthrough bulb,  $(c_2 - c_1)/L$  is the linear concentration gradient across the connecting tube and  $A$  is the cross-sectional area of the tube.

In the quasi-steady state, there is no accumulation in the connecting tube, establishing a mass balance in the two bulbs,

$$V_2 c_2 + V_1 c_1 = (V_1 + V_2) c_\infty, \quad (S4)$$

Where  $V_1$  is the volume of the spiked chamber,  $c_\infty$  is the stabilized concentration obtained at diffusion equilibrium conditions.

Combining the diffusivity equation with the mass balance equation gives:

$$\frac{\partial c_2}{\partial t} = - \frac{DA(V_1 + V_2)}{LV_1 V_2} (c_2 - c_\infty) \quad (S5)$$

The time-series concentration of the bulb is found by substituting the initial concentration of  $c_0$ , measured immediately after  $H_2$  injection into the solution of Eq. (S5), which is given by <sup>35-37</sup>

$$\frac{c(t)}{c_o} = \left(1 - \frac{c_\infty}{c_o}\right) e^{-\frac{DA(V_1 + V_2)}{LV_1V_2}t} + \frac{c_\infty}{c_o} \quad (\text{S6})$$

In the above formula,  $c(t) \rightarrow c_\infty$  for sufficiently large diffusion time (i.e., time to reach equilibrium conditions). A linear relationship can be found by log-transformation of the concentration solution, i.e.,

$$\ln(c_\infty - c(t)) = -\frac{DA(V_1 + V_2)}{LV_1V_2}t + \ln(c_\infty - c_o) \quad (\text{S7})$$

The effective diffusion coefficient of the rock samples can be determined from the slope of the semi-log plot of  $(c_\infty - c)$  against diffusion time.  $(c_\infty - c)$  is the concentration change in the spiked or breakthrough bulb, monitored through continuous sampling and mass spectrometry analysis.

### *Simulation Model in CMG-GEM*

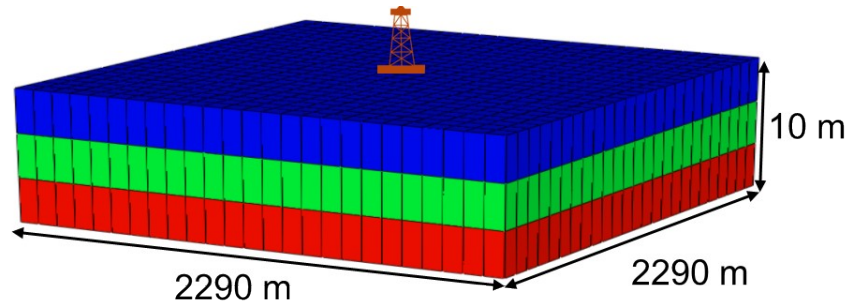

Z:X = 61:1

**Figure S2:** Numerical model used to simulate  $H_2$  plume migration in reservoir layers under advective and diffusive flow, with injection well placed in the center. Vertical direction is scaled 61 times more than horizontal direction.
